# Supplementary material for: Evaluating The Relationship Between Dermatoglyphics and Mandibular Third Molar Impaction - A Cross-Sectional study
Source: Research Square preprint supplement (doi:10.21203/rs.3.rs-951125/v1), 2021-10-08
Supplement: Supplementary file 1 [file b7f8fba639aa33d8176daad6.docx]

Evaluating the relationship between dermatoglyphics and mandibular third molar impaction: a cross-sectional study

**FINGERPRINT PATTERN**

Appendix Figure 1: WHORL PATTERN

1A: PLAIN WHORL


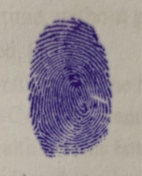


1B: CENTRAL POCKET WHORL


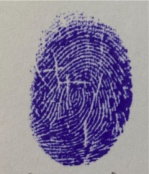


1C: DOUBLE LOOP WHORL


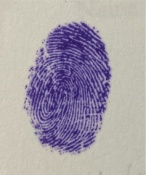


1D: IRREGULAR WHORL


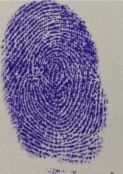


Appendix Figure 2: LOOP PATTERN

2A: LOOP RADIAL


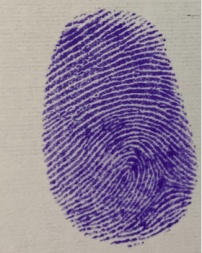


2B:LOOP ULNAR


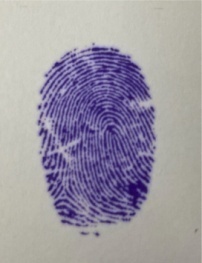


Appendix Figure 3: ARCH PATTERN

3A: PLAIN ARCH


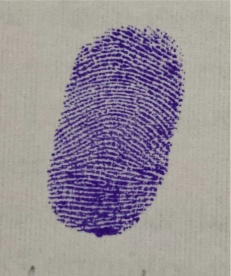


3B:TENTED ARCH


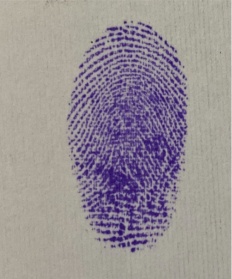


**INFORMED CONSENT & STUDY PROFORMA SHEET**

**CONTROL GROUP:**

Appendix Figure 4: Signed informed consent of Control Subject 1 **
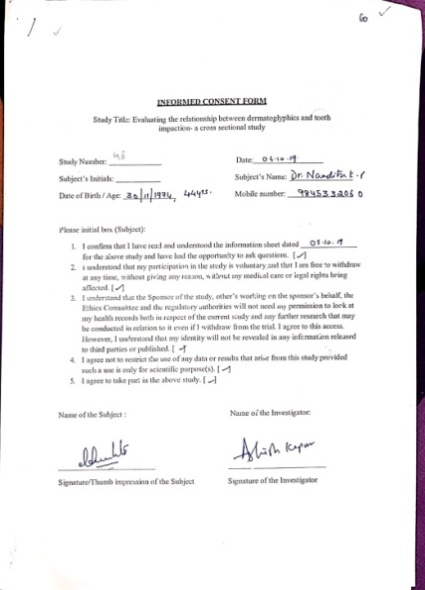
**

Appendix Figure 5:Study proforma sheet of Control Subject 1

**
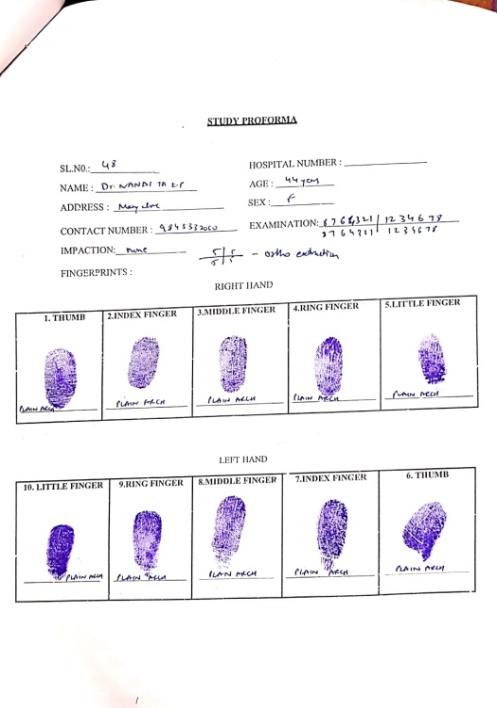
**

Appendix Figure 6: Signed informed consent of Control Subject 2
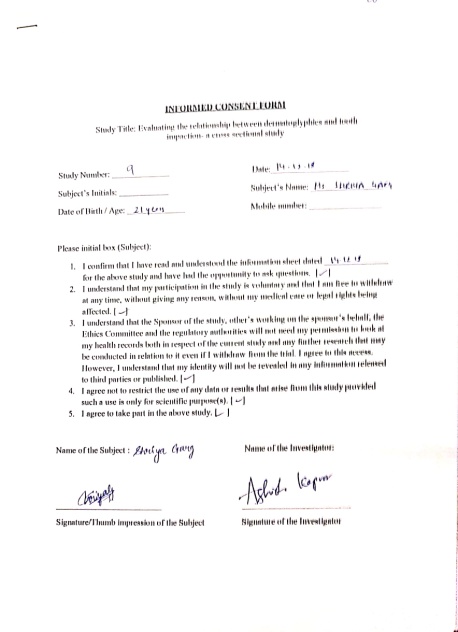


Appendix Figure 7:Study proforma sheet of Control Subject 2


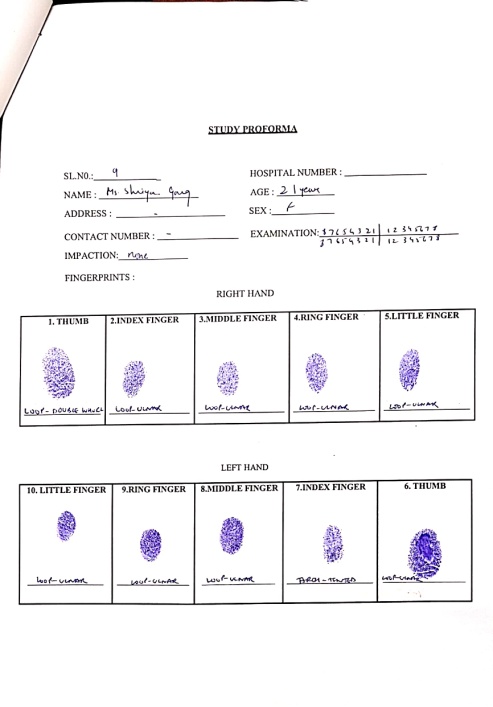


Appendix Figure 8: Signed informed consent of Control Subject 3
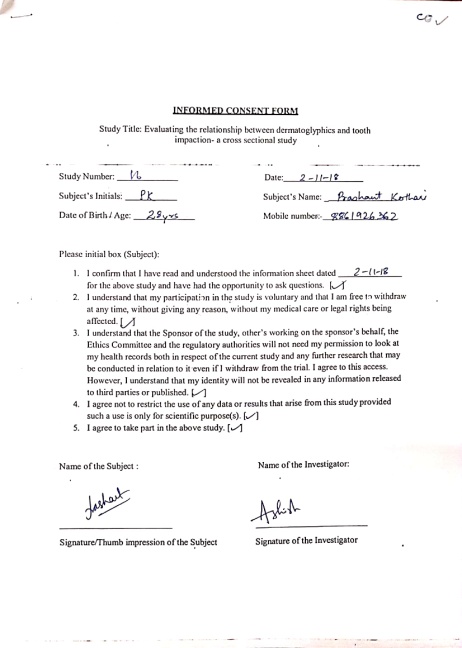


Appendix Figure 9:Study proforma sheet of Control Subject 3


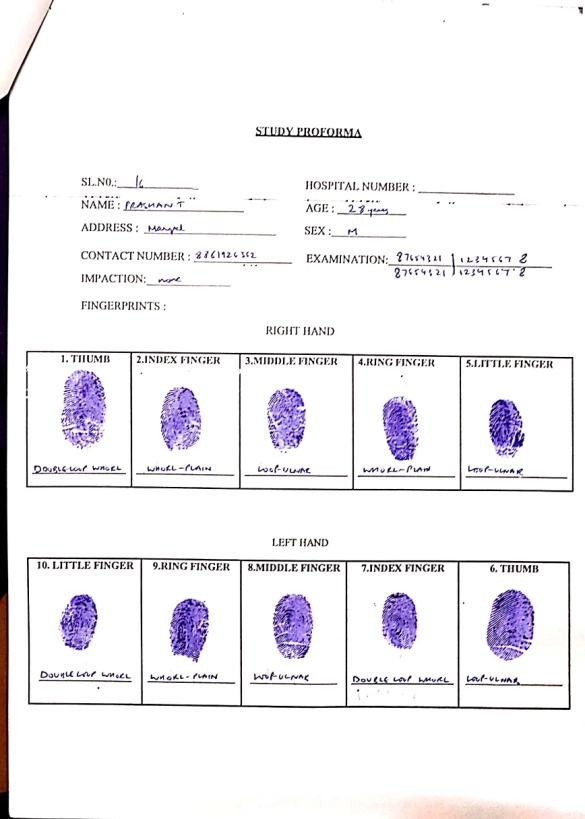


Appendix Figure 10: Signed informed consent of Control Subject 4

:
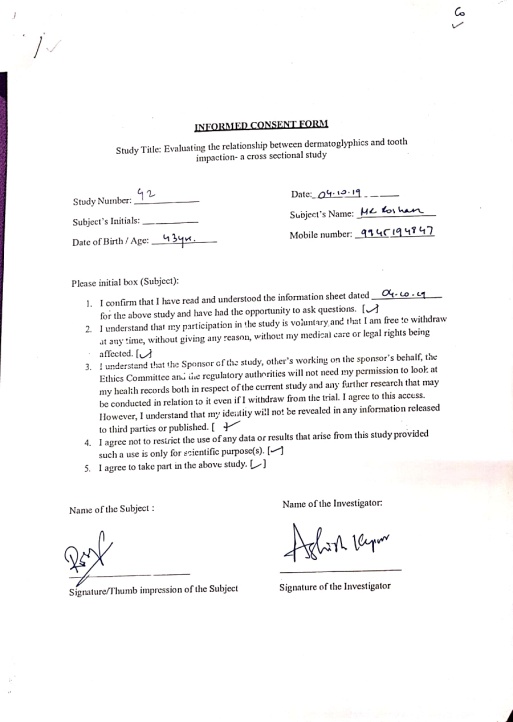


Appendix Figure 11 :Study proforma sheet of Control Subject 4


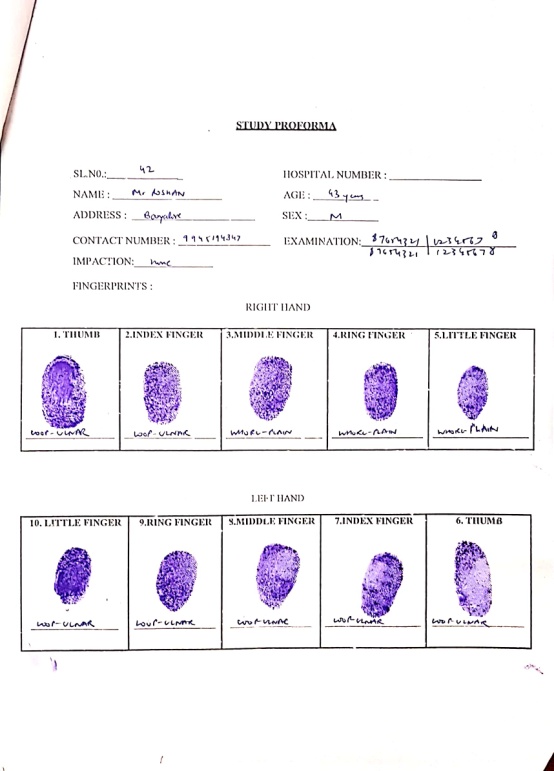


Appendix Figure 12: Signed informed consent of Control Subject 5


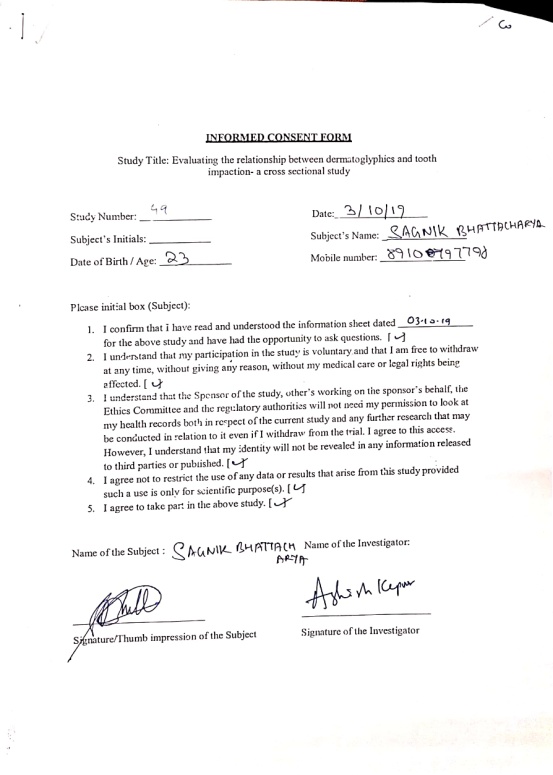


Appendix Figure 13 :Study proforma sheet of Control Subject 5


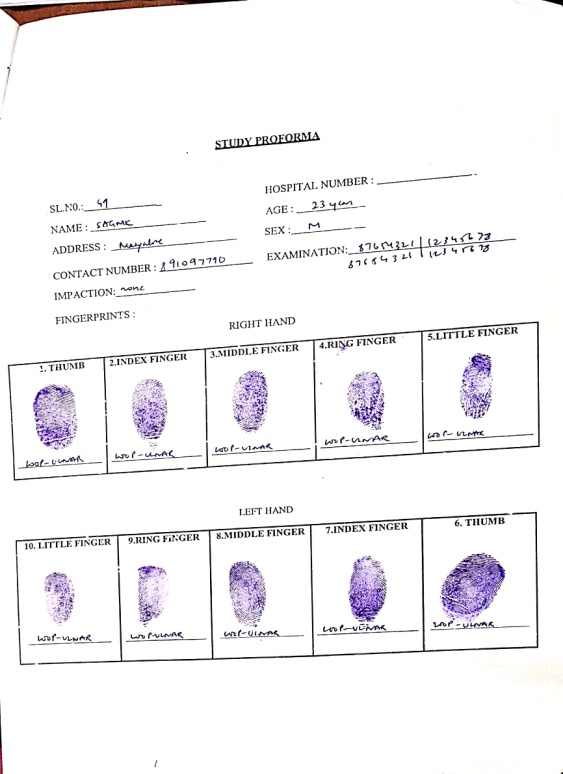


**CASE GROUP:**

Appendix Figure 14: Signed informed consent of Case Subject 1


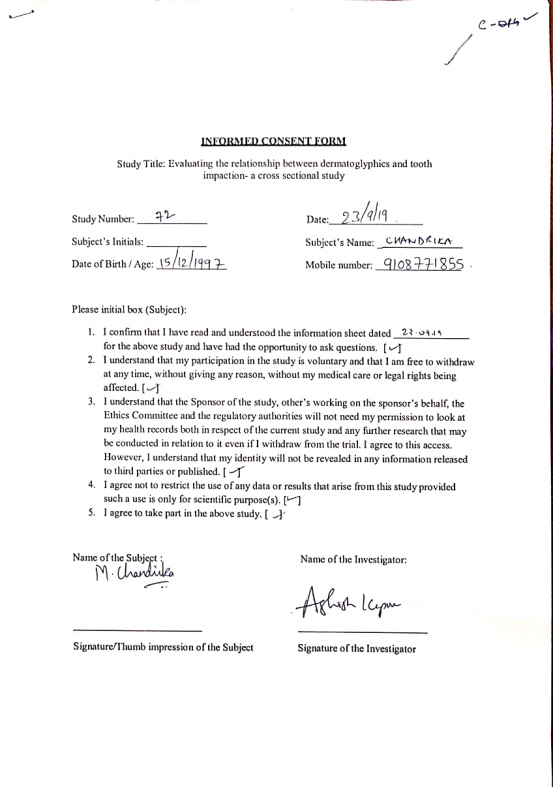


Appendix Figure 15 :Study proforma sheet of Case Subject 1


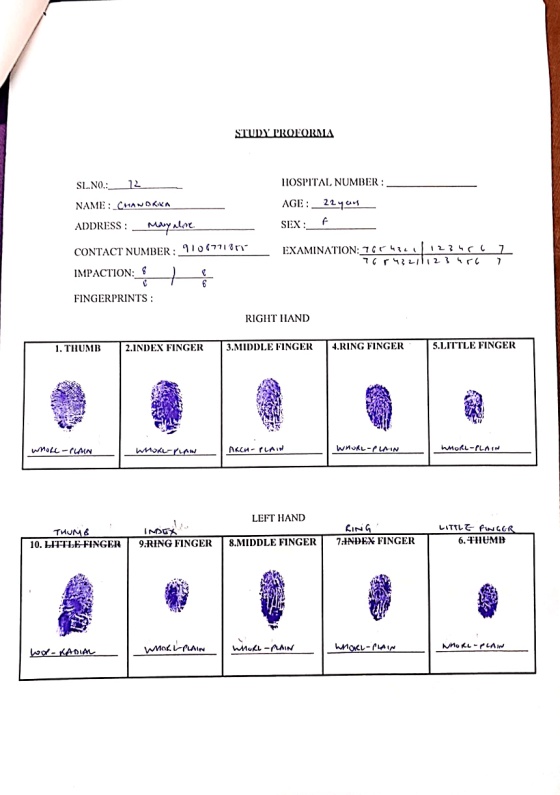


Appendix Figure 16: Signed informed consent of Case Subject 2


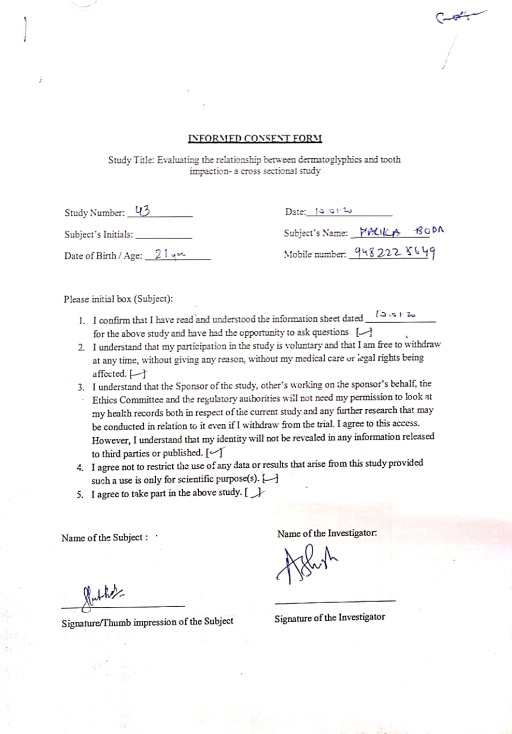


Appendix Figure 17 :Study proforma sheet of Case Subject 2


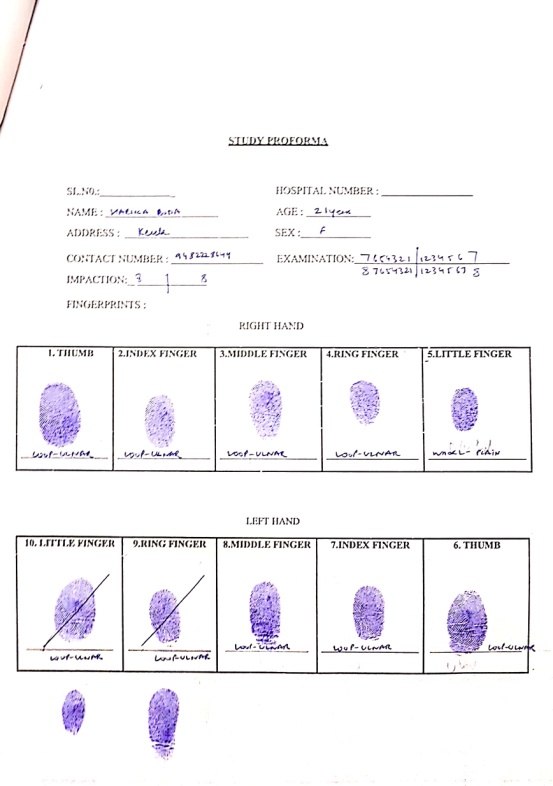


Appendix Figure 18: Signed informed consent of Case Subject 3


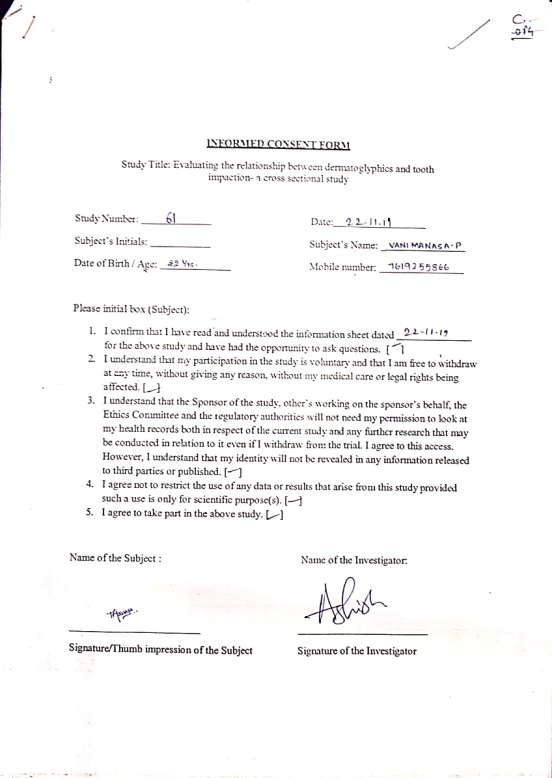


Appendix Figure 19:Study proforma sheet of Case Subject 3


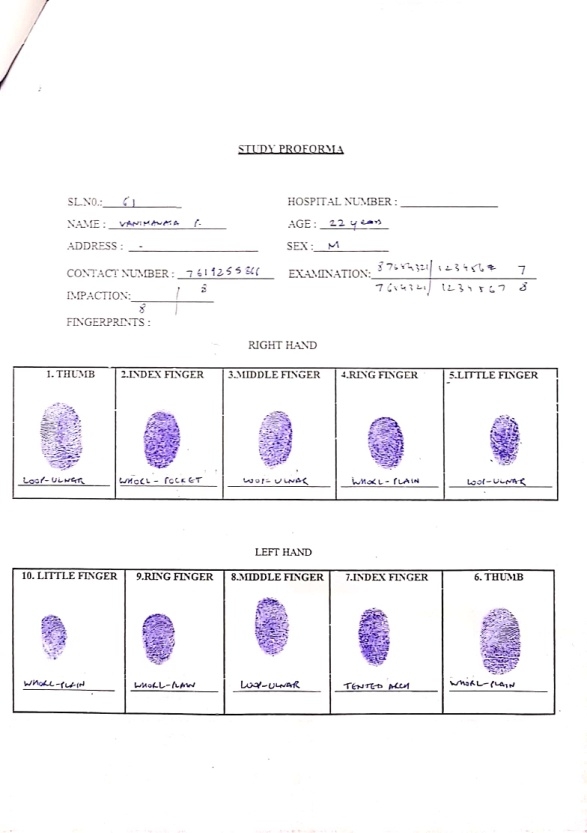


Appendix Figure 20: Signed informed consent of Case Subject 4


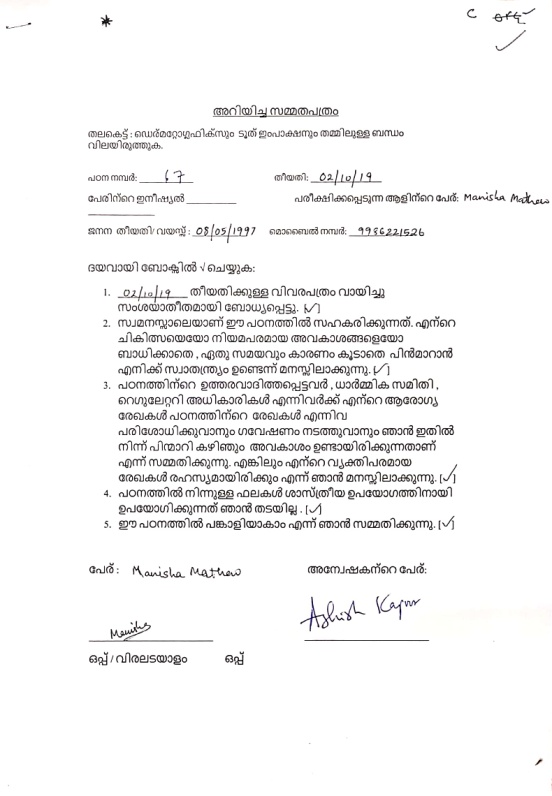


Appendix Figure 21 :Study proforma sheet of Case Subject 4


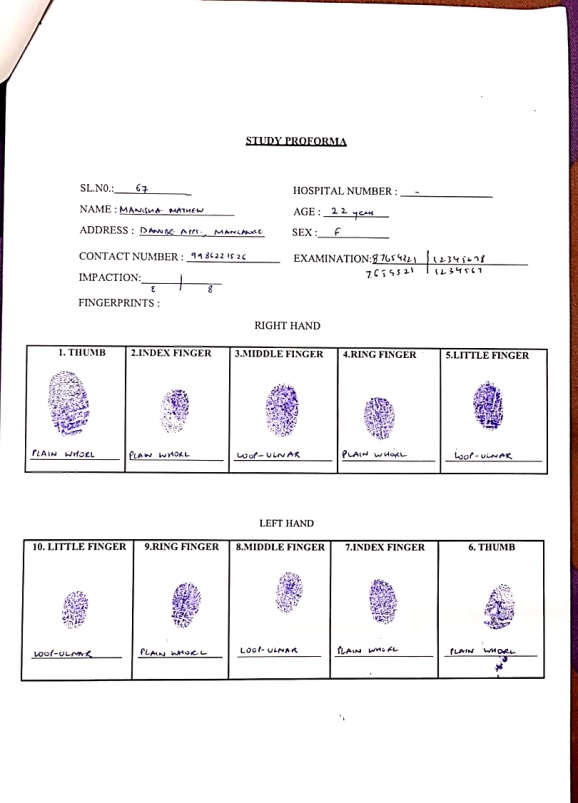


Appendix Figure 22: Signed informed consent of Case Subject 5


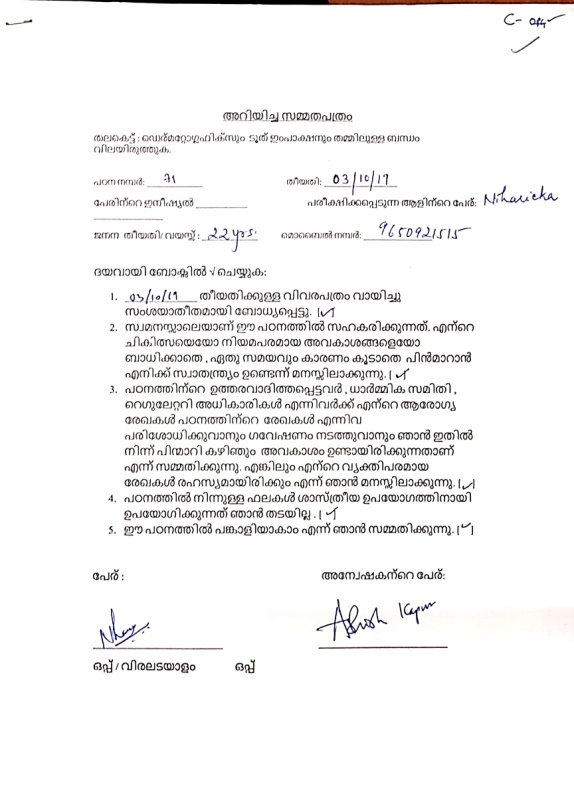


Appendix Figure 23 :Study proforma sheet of Case Subject 5


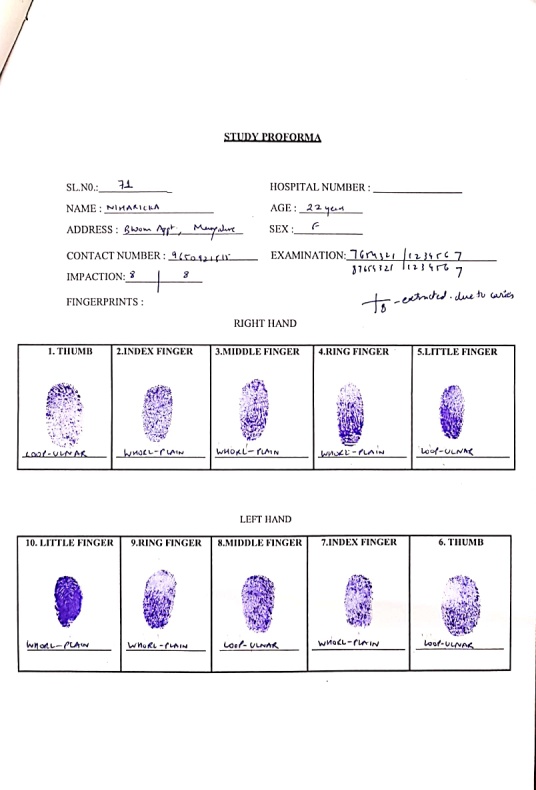


**PATIENT INFORMATION SHEET**

Appendix Figure 24: PATIENT INFORMATION SHEET IN KANNADA

**
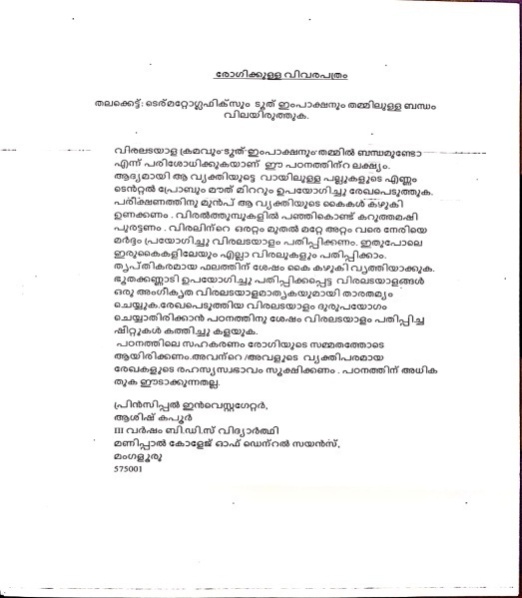
**

Appendix Figure 25: PATIENT INFORMATION SHEET IN MALAYALAM

**
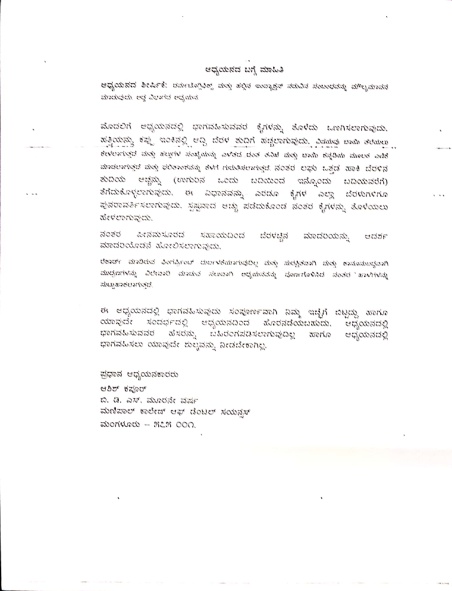
**

Appendix Figure 26: PATIENT INFORMATION SHEET IN ENGLISH

**
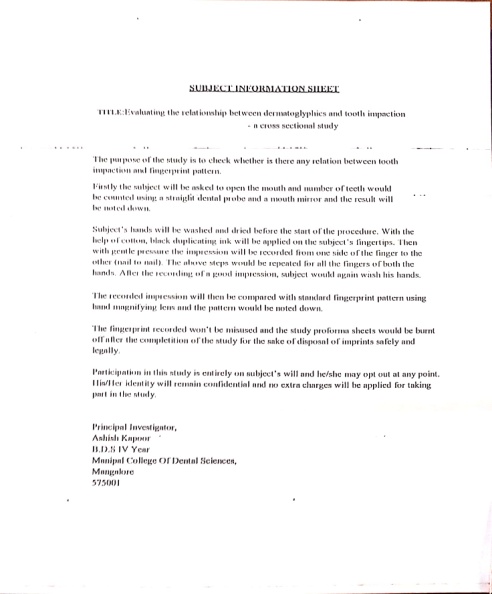
**

**OPG X-RAY**

Appendix Figure 27: OPG X-RAY OF CASE SUBJECT 1

**
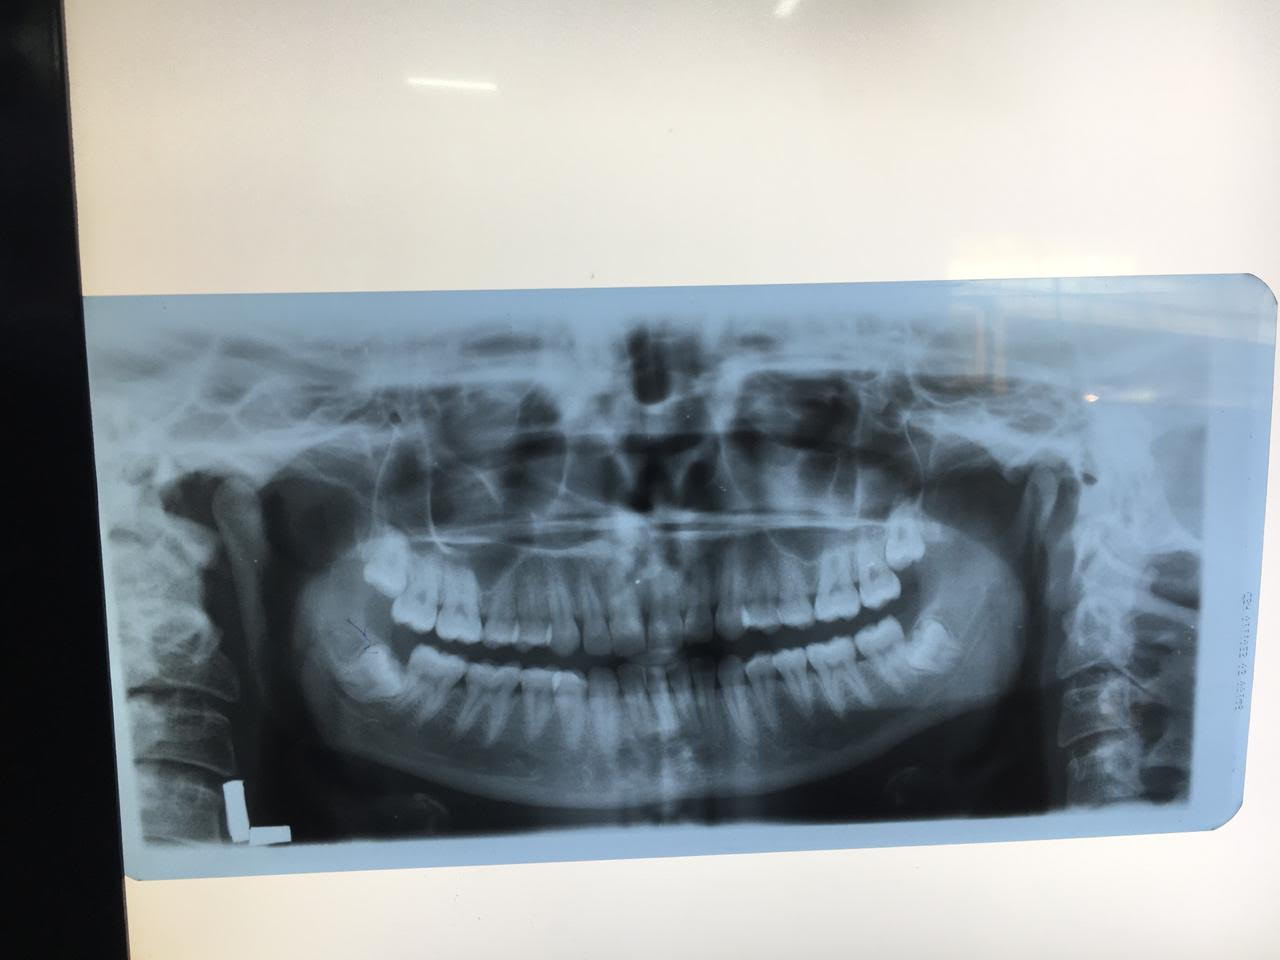
**

Appendix Figure 28: OPG X-RAY OF CASE SUBJECT 2

**
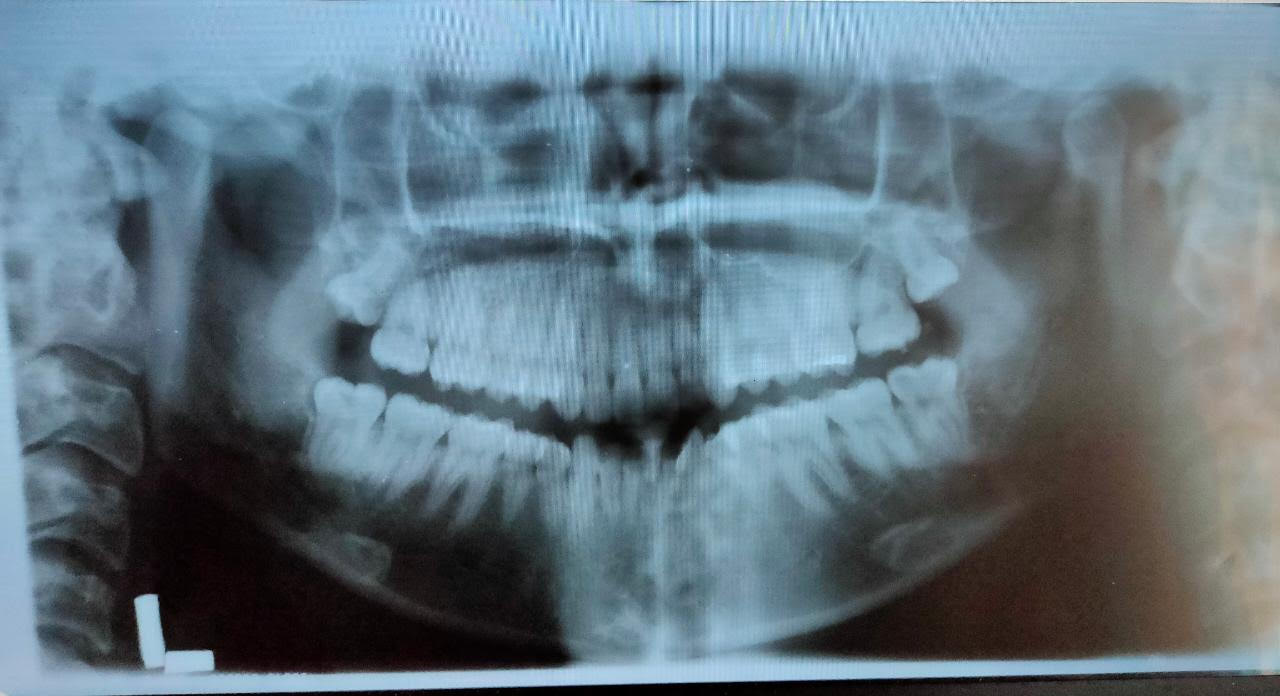
**

Appendix Figure 29: OPG X-RAY OF CASE SUBJECT 3

**
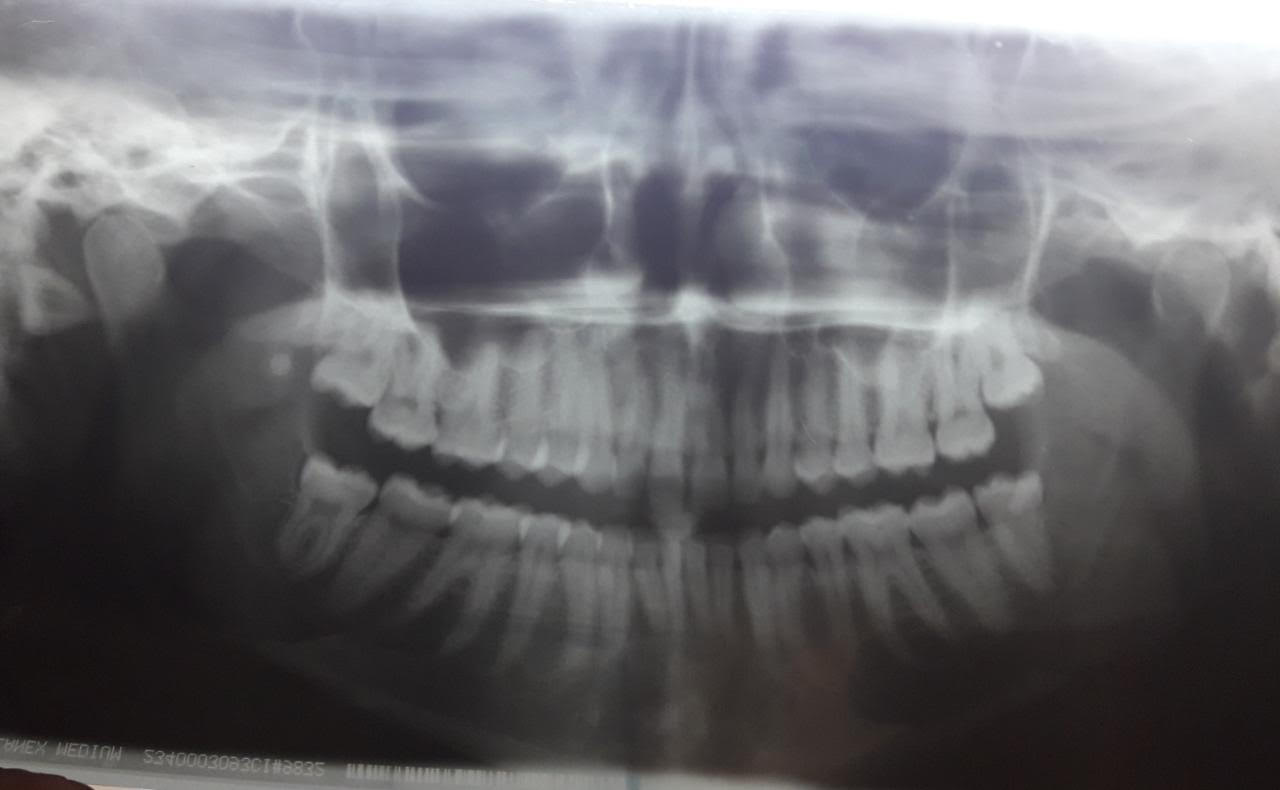
**

Appendix Figure 30: OPG X-RAY OF CASE SUBJECT 4

**
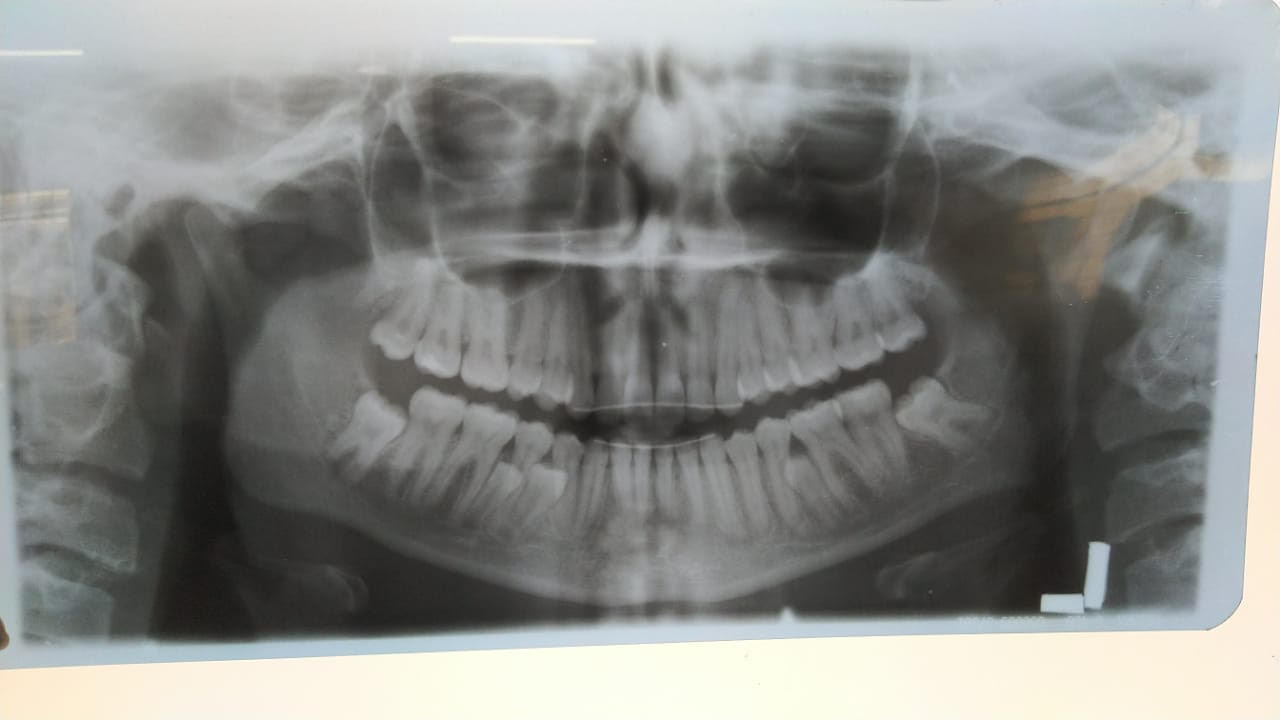
**

Appendix Figure 31: OPG X-RAY OF CASE SUBJECT 5

**
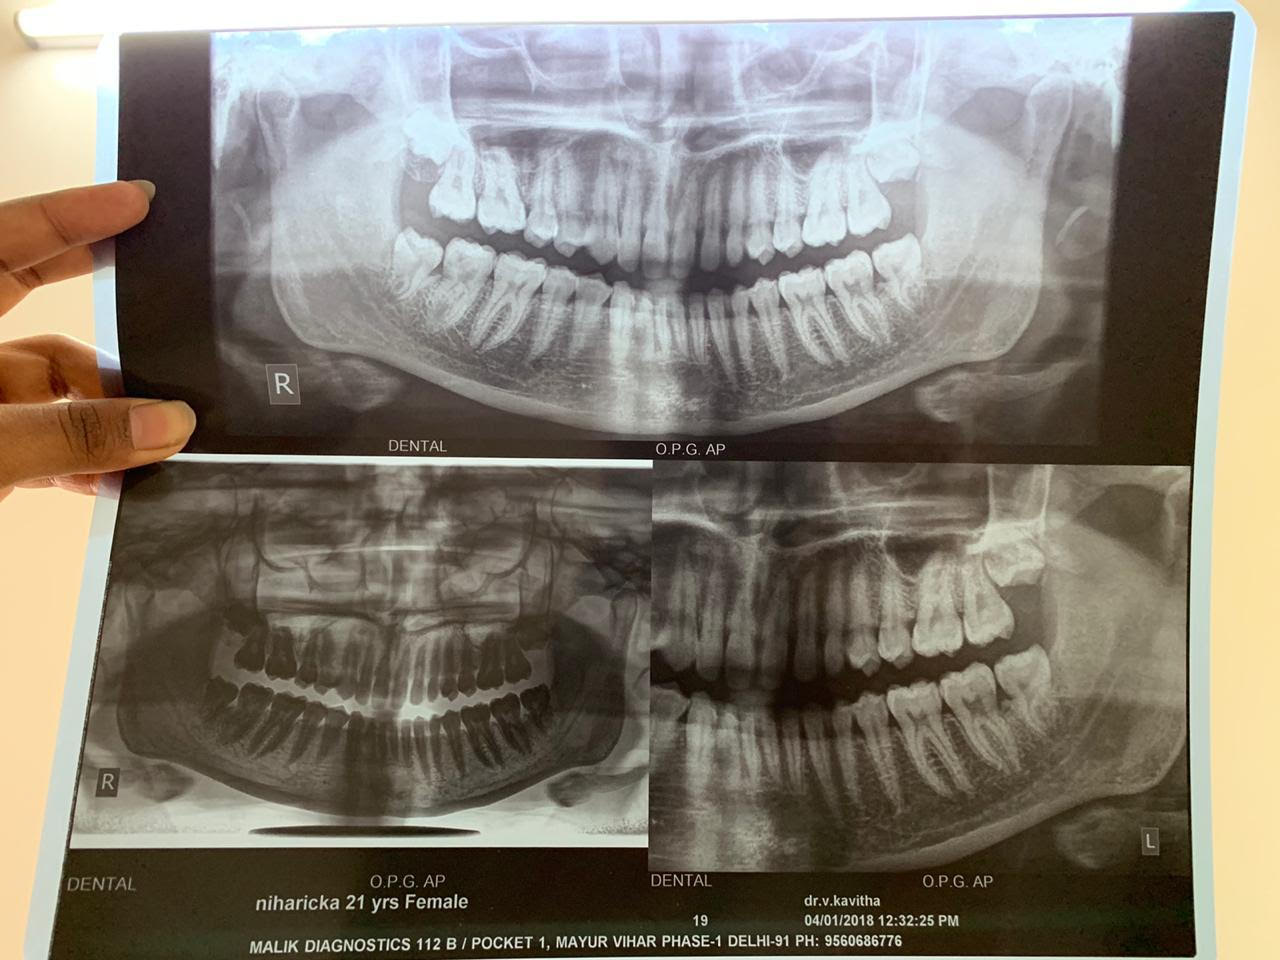
**
